# Supplementary material for: Development and usability of a hospital standardized ADL ratio (HSAR) for elderly patients with cerebral infarction: a retrospective observational study using administrative claim data from 2012 to 2019 in Japan
Source: Springer Nature journal article supplement (doi:10.1186/s12877-023-03957-4), 2023-04-18
Supplement: MOESM5 [file 25255604]

a. 2012-2019

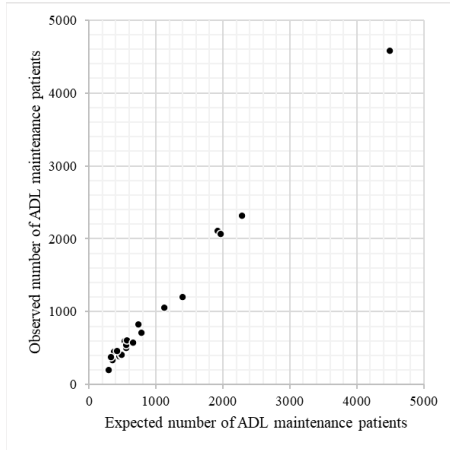

b. 2012-2013

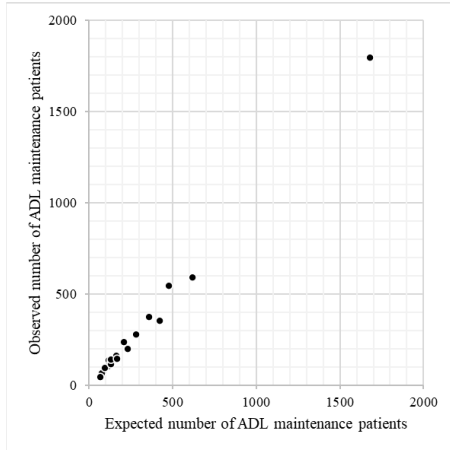

c. 2014-2015

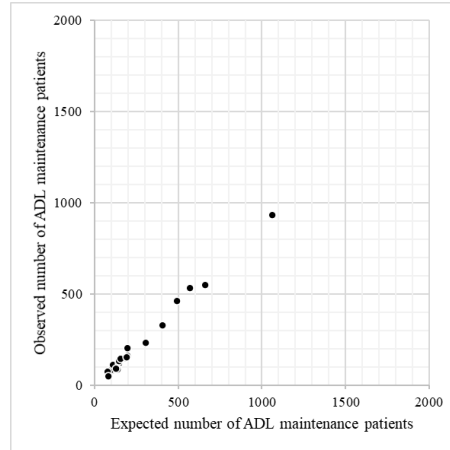

d. 2016-2017

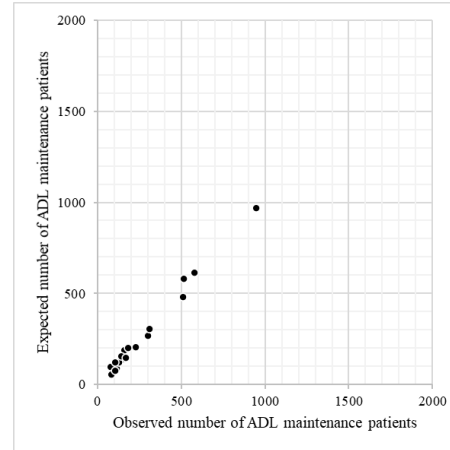

e. 2018-2019

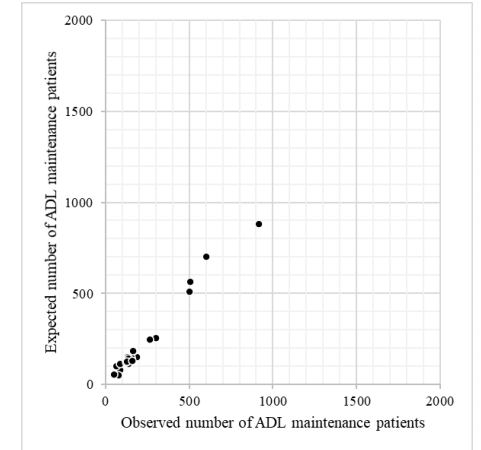

Figure S1. Variation of the expected number of M/I-ADL patients and the actual number of M/I-ADL patients
