# Supplementary material for: Development and usability of a hospital standardized ADL ratio (HSAR) for elderly patients with cerebral infarction: a retrospective observational study using administrative claim data from 2012 to 2019 in Japan
Source: Springer Nature journal article supplement (doi:10.1186/s12877-023-03957-4), 2023-04-18
Supplement: MOESM6 [file 25255604]

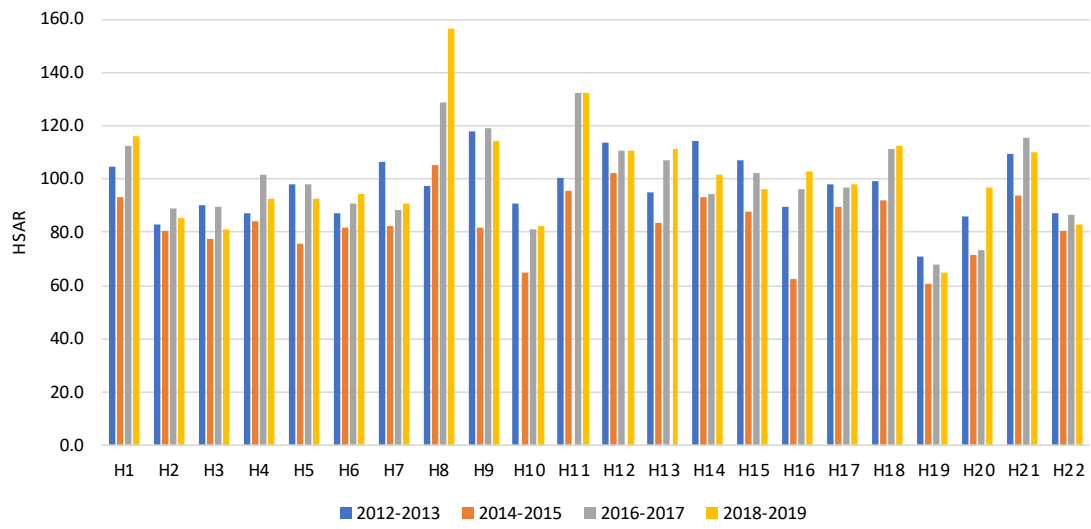

Figure S2. Changes of HSAR by fiscal year in each hospital  
 HSAR = Hospital Standardized ADL Ratio
